# Supplementary material for: A Novel Ferroptosis-Related Lncrnas Signature for Prognosis Prediction in Patients with Papillary Renal Cell Carcinoma
Source: Research Square preprint supplement (doi:10.21203/rs.3.rs-625377/v1), 2021-06-23
Supplement: Supplementary file 1 [file 440169e06b2759004071eefe.docx]

Table S. Differentially expressed ferroptosis-related genes between normal and tumor samples

| **Gene** | **Normal** | **Tumor** | **logFC** | **pValue** | **fdr** |
| --- | --- | --- | --- | --- | --- |
| CA9 | 0.183742 | 10.44999 | 5.829679 | 5.88E-12 | 3.67E-11 |
| ALOX15B | 0.067269 | 3.502897 | 5.702472 | 1.19E-15 | 1.94E-14 |
| HAMP | 0.052428 | 1.730405 | 5.044642 | 6.23E-19 | 4.40E-17 |
| CDKN2A | 0.056549 | 1.306743 | 4.530332 | 4.06E-18 | 2.15E-16 |
| SLC7A11 | 0.049419 | 0.899788 | 4.186444 | 2.93E-08 | 8.29E-08 |
| AKR1C2 | 1.285675 | 13.20046 | 3.35999 | 2.60E-11 | 1.41E-10 |
| NNMT | 14.92983 | 130.0039 | 3.122285 | 9.36E-11 | 4.13E-10 |
| RRM2 | 0.291313 | 2.0096 | 2.786267 | 2.70E-15 | 4.08E-14 |
| TFR2 | 0.037509 | 0.252733 | 2.752319 | 4.63E-12 | 3.01E-11 |
| ALOX5 | 3.297105 | 20.22767 | 2.617059 | 3.43E-15 | 4.70E-14 |
| AKR1C1 | 6.627963 | 35.07633 | 2.40386 | 4.21E-10 | 1.59E-09 |
| SLC2A14 | 0.027761 | 0.142655 | 2.361379 | 1.12E-06 | 2.73E-06 |
| TRIB3 | 1.843433 | 7.543769 | 2.03289 | 3.40E-07 | 8.79E-07 |
| MYB | 0.031253 | 0.116456 | 1.897712 | 3.21E-10 | 1.26E-09 |
| NCF2 | 1.606364 | 5.906506 | 1.878506 | 2.54E-10 | 1.02E-09 |
| HILPDA | 3.696775 | 12.53747 | 1.761907 | 2.52E-07 | 6.60E-07 |
| SCD | 7.83567 | 26.24465 | 1.743895 | 8.60E-09 | 2.57E-08 |
| ALOXE3 | 0.026752 | 0.087776 | 1.714172 | 0.002986 | 0.00449 |
| DRD4 | 0.361113 | 1.168152 | 1.693705 | 4.62E-07 | 1.15E-06 |
| HMOX1 | 28.31426 | 89.81349 | 1.665404 | 0.000313 | 0.000522 |
| ASNS | 2.723181 | 8.129323 | 1.577843 | 7.46E-16 | 1.48E-14 |
| G6PD | 10.0201 | 29.39037 | 1.552447 | 3.22E-14 | 3.11E-13 |
| TXNRD1 | 11.72727 | 34.38001 | 1.551703 | 0.000368 | 0.000604 |
| HSPB1 | 246.4514 | 693.8058 | 1.493229 | 3.65E-14 | 3.36E-13 |
| CD44 | 5.724324 | 15.56384 | 1.443021 | 0.000115 | 0.000199 |
| AURKA | 0.964695 | 2.482438 | 1.363613 | 3.54E-15 | 4.70E-14 |
| CDKN1A | 46.60617 | 115.9358 | 1.314733 | 8.48E-12 | 4.99E-11 |
| CAPG | 62.80648 | 147.1676 | 1.228475 | 3.29E-10 | 1.27E-09 |
| AKR1C3 | 17.2917 | 40.06542 | 1.212278 | 0.001005 | 0.00159 |
| CYBB | 4.305803 | 9.487468 | 1.139741 | 9.72E-06 | 2.02E-05 |
| WIPI1 | 8.213122 | 17.69784 | 1.107571 | 8.71E-13 | 6.60E-12 |
| SLC1A4 | 1.201783 | 2.50196 | 1.057883 | 1.88E-12 | 1.33E-11 |
| ZFP36 | 177.7934 | 88.05984 | -1.01365 | 2.42E-06 | 5.41E-06 |
| JDP2 | 3.773936 | 1.844203 | -1.03307 | 9.36E-15 | 1.17E-13 |
| GPT2 | 9.536058 | 4.466969 | -1.0941 | 4.61E-09 | 1.50E-08 |
| MUC1 | 75.70676 | 35.42383 | -1.0957 | 1.89E-09 | 6.45E-09 |
| PRKAA2 | 8.686692 | 3.995489 | -1.12043 | 7.44E-17 | 2.25E-15 |
| DUSP1 | 220.2211 | 99.25799 | -1.1497 | 1.36E-10 | 5.64E-10 |
| ACO1 | 28.69987 | 12.3148 | -1.22065 | 8.59E-10 | 3.03E-09 |
| NOX3 | 0.004767 | 0.001884 | -1.33966 | 1.68E-08 | 4.88E-08 |
| NOS2 | 0.622319 | 0.242911 | -1.35723 | 8.36E-12 | 4.99E-11 |
| NOX4 | 17.91883 | 6.343711 | -1.49808 | 0.000368 | 0.000604 |
| ATF3 | 42.76979 | 14.96984 | -1.51453 | 5.78E-11 | 2.67E-10 |
| PSAT1 | 51.00619 | 15.29694 | -1.73743 | 3.20E-09 | 1.08E-08 |
| GCH1 | 8.26861 | 2.438451 | -1.76168 | 7.70E-16 | 1.48E-14 |
| LINC00472 | 4.693289 | 1.302543 | -1.84927 | 4.86E-16 | 1.14E-14 |
| EPAS1 | 71.1776 | 19.44846 | -1.87177 | 7.51E-18 | 3.11E-16 |
| MIOX | 358.8263 | 91.64315 | -1.96919 | 1.18E-06 | 2.84E-06 |
| PTGS2 | 2.529007 | 0.508222 | -2.31504 | 1.78E-14 | 1.89E-13 |
| CHAC1 | 5.431018 | 0.998558 | -2.4433 | 8.93E-16 | 1.58E-14 |
| ACSF2 | 35.16399 | 6.462491 | -2.44394 | 2.12E-11 | 1.18E-10 |
| PCK2 | 79.56581 | 13.84305 | -2.52299 | 4.92E-07 | 1.21E-06 |
| PROM2 | 36.159 | 5.515147 | -2.71288 | 8.79E-18 | 3.11E-16 |
| MT1G | 732.68 | 82.02988 | -3.15896 | 3.68E-19 | 3.90E-17 |
| SLC2A12 | 3.045033 | 0.225806 | -3.7533 | 1.04E-19 | 2.21E-17 |
| ALB | 72.17686 | 0.760357 | -6.56871 | 1.64E-16 | 4.36E-15 |

Table S. Differentially expressed ferroptosis-related lncRNAs between normal and tumor samples

| **lncRNA** | **Normal** | **Tumor** | **logFC** | **pValue** | **fdr** |
| --- | --- | --- | --- | --- | --- |
| LINC02615 | 0.585066 | 2.451457 | 2.066968 | 2.75E-10 | 2.36E-09 |
| AC087239.1 | 0.26865 | 1.117995 | 2.057112 | 2.72E-07 | 1.28E-06 |
| AP001439.1 | 0.108769 | 0.222333 | 1.031462 | 0.003853 | 0.006611 |
| AC118755.2 | 0.138957 | 0.432778 | 1.638992 | 0.000129 | 0.000318 |
| AC136475.5 | 0.136179 | 0.446066 | 1.711754 | 1.42E-06 | 5.65E-06 |
| N4BP2L2-IT2 | 0.196385 | 0.456121 | 1.215728 | 3.21E-05 | 9.02E-05 |
| AC068620.2 | 0.34204 | 0.749718 | 1.132184 | 0.000604 | 0.001263 |
| SMIM25 | 0.237987 | 2.732534 | 3.521285 | 7.42E-13 | 1.04E-11 |
| AC026369.3 | 0.024214 | 0.76028 | 4.972644 | 7.04E-12 | 8.22E-11 |
| AC108134.2 | 0.324725 | 1.279195 | 1.977943 | 2.05E-12 | 2.68E-11 |
| F11-AS1 | 2.146862 | 0.067706 | -4.9868 | 6.01E-20 | 4.94E-18 |
| AC040977.1 | 3.567445 | 10.49275 | 1.55643 | 2.80E-14 | 5.50E-13 |
| AC010422.2 | 0.190301 | 0.414563 | 1.123308 | 0.000527 | 0.001116 |
| ARHGEF2-AS1 | 0.082815 | 1.005421 | 3.601766 | 1.27E-07 | 6.49E-07 |
| SLFNL1-AS1 | 0.119153 | 0.317285 | 1.412968 | 4.03E-06 | 1.41E-05 |
| HOTAIRM1 | 4.711722 | 13.66361 | 1.536012 | 2.94E-05 | 8.37E-05 |
| LINC02678 | 0.099526 | 0.375865 | 1.917063 | 5.58E-09 | 3.77E-08 |
| ZNNT1 | 0.948283 | 2.274718 | 1.262298 | 1.25E-07 | 6.39E-07 |
| DARS-AS1 | 0.107988 | 0.235533 | 1.125051 | 1.65E-06 | 6.45E-06 |
| AC106886.3 | 0.112216 | 0.379957 | 1.759564 | 2.05E-06 | 7.84E-06 |
| AC005393.1 | 0.290881 | 0.668495 | 1.200487 | 8.65E-05 | 0.000222 |
| AC022306.3 | 0.235713 | 0.630422 | 1.419287 | 4.03E-07 | 1.79E-06 |
| GK-AS1 | 0.255471 | 0.61444 | 1.266115 | 3.95E-05 | 0.00011 |
| AC004492.1 | 0.386314 | 0.787136 | 1.026838 | 1.91E-05 | 5.77E-05 |
| AC104984.5 | 3.277199 | 0.447529 | -2.87241 | 8.51E-19 | 4.51E-17 |
| AC108134.4 | 0.816179 | 2.156949 | 1.402035 | 7.76E-10 | 6.18E-09 |
| AL023806.1 | 0.640435 | 0.212708 | -1.59018 | 3.34E-10 | 2.80E-09 |
| AC012593.2 | 2.269056 | 11.56532 | 2.349641 | 2.50E-06 | 9.36E-06 |
| AP002761.4 | 0.824812 | 0.374929 | -1.13745 | 4.83E-12 | 5.79E-11 |
| AC137630.3 | 0.355075 | 0.76559 | 1.108448 | 0.028882 | 0.040741 |
| AP000757.1 | 9.199936 | 1.368536 | -2.74899 | 1.87E-19 | 1.25E-17 |
| AL008582.1 | 0.266214 | 0.813327 | 1.611251 | 6.43E-06 | 2.16E-05 |
| AC080013.3 | 0.118601 | 0.488874 | 2.04334 | 4.96E-07 | 2.16E-06 |
| LINC01018 | 1.07399 | 0.142954 | -2.90936 | 2.28E-17 | 8.76E-16 |
| AC147651.1 | 0.36815 | 1.29132 | 1.810479 | 0.000181 | 0.00042 |
| GAPLINC | 0.058664 | 0.336708 | 2.520951 | 2.42E-09 | 1.75E-08 |
| LACTB2-AS1 | 0.054739 | 0.382575 | 2.805095 | 6.43E-16 | 1.79E-14 |
| AC005014.2 | 0.315876 | 0.914504 | 1.533633 | 5.87E-05 | 0.000157 |
| AC025287.3 | 0.341162 | 0.706379 | 1.049985 | 2.82E-05 | 8.12E-05 |
| AC005899.7 | 0.65319 | 1.787696 | 1.452526 | 7.51E-05 | 0.000195 |
| AC068792.1 | 0.249869 | 0.893362 | 1.838074 | 3.04E-11 | 3.15E-10 |
| AL109741.1 | 0.905951 | 0.282542 | -1.68097 | 1.35E-14 | 2.87E-13 |
| AL139041.1 | 0.078262 | 0.276328 | 1.819994 | 8.44E-06 | 2.78E-05 |
| SP2-AS1 | 0.519323 | 1.356088 | 1.384746 | 7.99E-15 | 1.77E-13 |
| AP006623.1 | 0.374989 | 0.801445 | 1.095756 | 2.70E-06 | 9.99E-06 |
| AP000553.2 | 0.199708 | 0.539996 | 1.435055 | 0.003324 | 0.005808 |
| AL109659.2 | 0.134241 | 0.29108 | 1.116587 | 0.015099 | 0.022454 |
| AL355512.1 | 0.05683 | 0.481415 | 3.082568 | 5.19E-10 | 4.25E-09 |
| AL359881.1 | 0.40088 | 1.4675 | 1.872117 | 5.01E-05 | 0.000136 |
| AC100803.3 | 0.602216 | 0.206666 | -1.54298 | 1.53E-13 | 2.55E-12 |
| AC087477.2 | 0.482953 | 1.560465 | 1.692021 | 1.44E-05 | 4.45E-05 |
| AC127024.4 | 0.433582 | 0.916916 | 1.080483 | 0.001019 | 0.00202 |
| LINC00244 | 0.044821 | 0.239719 | 2.419083 | 0.000162 | 0.000384 |
| AC007497.1 | 0.07314 | 0.25061 | 1.776709 | 2.71E-07 | 1.28E-06 |
| AC109460.2 | 0.411933 | 0.883306 | 1.100505 | 0.000852 | 0.00172 |
| AC092809.3 | 0.164922 | 0.330857 | 1.004428 | 0.002152 | 0.003895 |
| LINC01780 | 1.058108 | 0.355341 | -1.57421 | 1.42E-12 | 1.91E-11 |
| AC124017.1 | 2.877236 | 0.027022 | -6.73441 | 5.82E-26 | 1.44E-23 |
| LINC01637 | 1.177269 | 2.393174 | 1.023481 | 6.41E-08 | 3.49E-07 |
| AC015813.1 | 0.982237 | 2.593068 | 1.400517 | 2.70E-06 | 9.99E-06 |
| AC069549.1 | 0.083268 | 0.254312 | 1.610771 | 0.002826 | 0.005004 |
| AC124312.2 | 2.005721 | 0.69731 | -1.52425 | 1.59E-12 | 2.12E-11 |
| AC015819.1 | 0.240969 | 0.505825 | 1.069793 | 1.24E-05 | 3.88E-05 |
| CD27-AS1 | 4.167597 | 10.3343 | 1.310153 | 1.81E-14 | 3.73E-13 |
| C3orf35 | 0.097127 | 0.259842 | 1.419689 | 4.20E-07 | 1.85E-06 |
| AL158151.4 | 0.046783 | 0.536111 | 3.518489 | 9.41E-12 | 1.06E-10 |
| SOCS2-AS1 | 0.979291 | 0.347181 | -1.49605 | 4.96E-15 | 1.14E-13 |
| EHMT2-AS1 | 0.082865 | 0.424572 | 2.357175 | 2.70E-05 | 7.79E-05 |
| LINC02435 | 0.070725 | 0.278281 | 1.976253 | 0.000261 | 0.000591 |
| AC016738.1 | 0.169013 | 0.441187 | 1.384258 | 9.54E-06 | 3.09E-05 |
| VCAN-AS1 | 0.019868 | 0.252846 | 3.669769 | 2.15E-08 | 1.29E-07 |
| AC136475.3 | 4.277551 | 47.26356 | 3.465871 | 2.17E-07 | 1.04E-06 |
| ARHGAP27P1-BPTFP1-KPNA2P3 | 0.503516 | 1.581096 | 1.650817 | 2.61E-08 | 1.54E-07 |
| AC005696.3 | 0.142295 | 0.307684 | 1.112561 | 0.003405 | 0.005937 |
| AP000346.1 | 0.151398 | 0.429635 | 1.504761 | 0.026127 | 0.037281 |
| AC018638.7 | 0.389269 | 1.180583 | 1.600658 | 0.006312 | 0.010261 |
| AC116407.2 | 0.26245 | 1.110922 | 2.081642 | 3.15E-11 | 3.24E-10 |
| AC004687.1 | 0.157981 | 1.083252 | 2.777547 | 5.86E-11 | 5.76E-10 |
| AP006545.2 | 0.15176 | 0.336074 | 1.146989 | 0.003115 | 0.005476 |
| AL157392.4 | 0.250589 | 0.541193 | 1.11082 | 0.008439 | 0.013294 |
| ZFAS1 | 12.20228 | 26.79954 | 1.135057 | 4.24E-11 | 4.26E-10 |
| Z82185.1 | 0.625773 | 0.176677 | -1.82453 | 4.09E-33 | 2.36E-30 |
| AL157931.1 | 1.865702 | 44.52701 | 4.576891 | 1.98E-09 | 1.46E-08 |
| AC027682.4 | 0.087117 | 0.257468 | 1.563372 | 1.13E-05 | 3.58E-05 |
| U47924.3 | 0.203895 | 1.061306 | 2.379939 | 6.98E-11 | 6.77E-10 |
| AC068722.2 | 0.101808 | 0.414322 | 2.024896 | 6.59E-07 | 2.76E-06 |
| AC093458.1 | 0.167751 | 0.652391 | 1.959418 | 3.49E-07 | 1.59E-06 |
| AC008556.1 | 1.87345 | 0.274678 | -2.76989 | 9.75E-17 | 3.06E-15 |
| AL033527.3 | 0.049078 | 0.343617 | 2.807642 | 1.61E-07 | 8.10E-07 |
| AC004477.1 | 0.194128 | 0.479322 | 1.30399 | 5.29E-07 | 2.27E-06 |
| AL353801.3 | 0.141103 | 0.637886 | 2.176552 | 2.65E-09 | 1.89E-08 |
| AC026471.4 | 2.224179 | 5.488237 | 1.30307 | 1.71E-09 | 1.27E-08 |
| MIR200CHG | 3.127649 | 0.879013 | -1.83112 | 1.69E-21 | 1.72E-19 |
| AL133410.1 | 0.39277 | 0.944368 | 1.265665 | 0.000137 | 0.000333 |
| AC005840.4 | 0.864947 | 2.615619 | 1.596468 | 7.07E-07 | 2.93E-06 |
| AC019080.1 | 6.489932 | 0.668385 | -3.27945 | 2.45E-10 | 2.13E-09 |
| AC011498.6 | 0.287258 | 0.625945 | 1.123686 | 3.91E-06 | 1.38E-05 |
| AC107081.2 | 0.122302 | 0.281522 | 1.202794 | 0.000148 | 0.000354 |
| HMGA1P4 | 0.63025 | 1.705275 | 1.436009 | 1.20E-05 | 3.81E-05 |
| AC008655.2 | 0.203056 | 0.47835 | 1.236185 | 0.000306 | 0.000688 |
| AC020907.4 | 0.251097 | 0.582738 | 1.2146 | 1.62E-05 | 4.95E-05 |
| LUCAT1 | 0.01573 | 0.319393 | 4.343711 | 2.56E-13 | 4.10E-12 |
| AC147067.1 | 0.60033 | 1.499805 | 1.320947 | 4.93E-06 | 1.69E-05 |
| AC011005.4 | 0.297922 | 1.144493 | 1.941701 | 4.99E-07 | 2.17E-06 |
| AC105020.1 | 0.180142 | 0.513349 | 1.510803 | 0.000549 | 0.001159 |
| AC010997.5 | 0.151591 | 0.317296 | 1.06565 | 0.021083 | 0.030564 |
| AP000240.1 | 0.437549 | 1.135721 | 1.376092 | 1.21E-05 | 3.83E-05 |
| AL162741.1 | 0.09764 | 0.346285 | 1.826422 | 6.68E-06 | 2.24E-05 |
| PPP4R1-AS1 | 0.166078 | 0.573453 | 1.787812 | 3.28E-06 | 1.19E-05 |
| KMT2E-AS1 | 4.306017 | 9.75825 | 1.180268 | 1.41E-05 | 4.34E-05 |
| AL021707.6 | 1.11676 | 2.411099 | 1.110371 | 0.000936 | 0.001871 |
| AC040934.1 | 0.065931 | 0.239021 | 1.858118 | 3.97E-06 | 1.40E-05 |
| AC022762.2 | 0.488004 | 1.069462 | 1.131919 | 0.002396 | 0.004294 |
| AL135791.1 | 0.303324 | 0.651255 | 1.102362 | 8.80E-05 | 0.000224 |
| AL022344.1 | 0.28699 | 0.82399 | 1.521626 | 9.72E-06 | 3.14E-05 |
| NALT1 | 0.416439 | 1.442126 | 1.792021 | 1.55E-08 | 9.64E-08 |
| AC093788.1 | 0.2292 | 0.553743 | 1.272611 | 1.88E-05 | 5.68E-05 |
| AC129510.1 | 0.779799 | 2.892716 | 1.891251 | 3.56E-08 | 2.04E-07 |
| AC132872.3 | 0.755097 | 2.042979 | 1.43594 | 5.40E-07 | 2.30E-06 |
| AL391244.2 | 0.655392 | 1.462998 | 1.158497 | 3.12E-07 | 1.44E-06 |
| AL591895.1 | 14.27808 | 32.89455 | 1.204046 | 2.08E-07 | 1.01E-06 |
| AP000345.2 | 0.545144 | 1.901688 | 1.802572 | 0.012912 | 0.019589 |
| CEP250-AS1 | 0.090789 | 0.282716 | 1.638763 | 2.55E-09 | 1.84E-08 |
| AC063919.1 | 3.916914 | 1.27798 | -1.61585 | 3.88E-09 | 2.71E-08 |
| AC084781.1 | 0.32462 | 0.869349 | 1.421185 | 3.68E-05 | 0.000103 |
| AC138305.1 | 0.831292 | 0.332327 | -1.32275 | 1.02E-11 | 1.15E-10 |
| AL139089.1 | 0.613456 | 1.278146 | 1.059021 | 0.000161 | 0.000382 |
| AC108673.3 | 1.751636 | 4.664623 | 1.413058 | 5.22E-06 | 1.77E-05 |
| LINC01055 | 10.52023 | 0.230896 | -5.50978 | 8.03E-17 | 2.57E-15 |
| LINC01836 | 5.19957 | 2.327463 | -1.15963 | 6.67E-05 | 0.000176 |
| AC012645.3 | 0.092867 | 0.273427 | 1.557915 | 1.09E-07 | 5.65E-07 |
| AL355488.1 | 0.933477 | 2.259324 | 1.275205 | 8.77E-06 | 2.88E-05 |
| LINC01559 | 0.187712 | 0.867811 | 2.208862 | 0.003939 | 0.006745 |
| AC004034.1 | 0.14086 | 0.346556 | 1.298825 | 4.04E-07 | 1.79E-06 |
| TMEM92-AS1 | 0.031821 | 0.381236 | 3.582645 | 2.76E-13 | 4.34E-12 |
| AC020558.2 | 0.434451 | 1.082698 | 1.317366 | 0.00026 | 0.000588 |
| AC002064.3 | 0.345745 | 1.375499 | 1.992176 | 8.75E-05 | 0.000223 |
| AL031429.2 | 6.502829 | 0.331106 | -4.2957 | 3.02E-26 | 8.71E-24 |
| AC027348.1 | 0.163089 | 0.57411 | 1.815667 | 0.003728 | 0.006429 |
| LMNTD2-AS1 | 1.538213 | 5.711861 | 1.892705 | 5.12E-05 | 0.000139 |
| AL590617.2 | 0.890507 | 1.789353 | 1.00674 | 3.91E-06 | 1.38E-05 |
| AC010973.2 | 0.364378 | 1.324715 | 1.862174 | 6.34E-10 | 5.16E-09 |
| AC003070.1 | 0.591574 | 2.747283 | 2.215375 | 1.92E-11 | 2.06E-10 |
| LINC00460 | 0.006752 | 0.277945 | 5.363285 | 3.77E-06 | 1.34E-05 |
| SNHG12 | 1.14781 | 4.257549 | 1.891139 | 2.81E-12 | 3.55E-11 |
| AC073130.2 | 0.109936 | 0.232994 | 1.08363 | 0.013414 | 0.020261 |
| AC010655.2 | 0.064385 | 0.359214 | 2.480038 | 2.87E-07 | 1.34E-06 |
| ZEB1-AS1 | 1.928889 | 4.138109 | 1.101202 | 7.96E-10 | 6.31E-09 |
| AL358472.3 | 0.857254 | 2.142901 | 1.32177 | 6.84E-10 | 5.50E-09 |
| AC108488.1 | 1.351044 | 2.955056 | 1.129111 | 7.38E-10 | 5.90E-09 |
| AC087741.1 | 0.836501 | 2.436703 | 1.542492 | 3.12E-07 | 1.44E-06 |
| AL031714.1 | 0.37636 | 0.820561 | 1.124498 | 1.22E-05 | 3.85E-05 |
| AC104964.4 | 0.25181 | 0.602262 | 1.258054 | 0.000425 | 0.000919 |
| AC016876.3 | 0.163502 | 0.401672 | 1.296705 | 3.05E-10 | 2.58E-09 |
| AC114956.1 | 0.160137 | 0.75128 | 2.230048 | 5.34E-05 | 0.000144 |
| AC003102.1 | 0.790467 | 1.793116 | 1.181691 | 1.72E-05 | 5.20E-05 |
| AC010624.2 | 0.095116 | 0.298804 | 1.651437 | 0.023466 | 0.033763 |
| AC009133.1 | 0.970337 | 2.721948 | 1.488082 | 1.49E-16 | 4.36E-15 |
| AC124854.1 | 0.795661 | 0.203592 | -1.96647 | 3.45E-18 | 1.61E-16 |
| AC019257.1 | 0.549157 | 2.914058 | 2.407739 | 2.98E-09 | 2.11E-08 |
| AC011330.2 | 0.253259 | 0.516598 | 1.028427 | 9.28E-06 | 3.02E-05 |
| AC005962.1 | 0.366239 | 0.855219 | 1.223508 | 5.08E-05 | 0.000138 |
| AC025171.2 | 0.435957 | 1.582323 | 1.859788 | 1.44E-13 | 2.44E-12 |
| AP001160.1 | 0.278051 | 0.561511 | 1.013966 | 0.000341 | 0.000755 |
| AC011462.4 | 1.18458 | 2.460987 | 1.054862 | 0.000102 | 0.000256 |
| AC135050.3 | 0.326094 | 1.174954 | 1.849246 | 3.51E-07 | 1.59E-06 |
| AL139099.3 | 0.13348 | 0.283875 | 1.088632 | 0.009551 | 0.014881 |
| AC046143.2 | 0.585279 | 1.44465 | 1.303523 | 2.15E-07 | 1.04E-06 |
| AC017104.1 | 0.347706 | 1.29138 | 1.892976 | 4.90E-12 | 5.84E-11 |
| AC112496.1 | 0.197806 | 0.492595 | 1.316318 | 1.13E-05 | 3.58E-05 |
| AL135999.3 | 1.688722 | 0.050005 | -5.07772 | 9.33E-23 | 1.34E-20 |
| AC026333.4 | 0.120153 | 0.460797 | 1.939258 | 6.92E-06 | 2.32E-05 |
| AL096865.1 | 0.065285 | 0.317858 | 2.283567 | 8.23E-08 | 4.39E-07 |
| AL161668.4 | 1.561737 | 0.12132 | -3.68626 | 6.49E-18 | 2.95E-16 |
| LINC02848 | 0.185995 | 0.389372 | 1.065887 | 0.022739 | 0.032799 |
| AC144548.1 | 0.101422 | 0.232738 | 1.198331 | 0.0001 | 0.000252 |
| LINC02522 | 0.011615 | 0.628734 | 5.758371 | 1.41E-07 | 7.13E-07 |
| LAMC1-AS1 | 0.218222 | 0.614274 | 1.493083 | 0.000158 | 0.000377 |
| AC084036.1 | 2.487543 | 7.111684 | 1.51547 | 1.70E-08 | 1.05E-07 |
| AC107982.3 | 0.284573 | 0.636039 | 1.16032 | 2.01E-07 | 9.82E-07 |
| LINC01094 | 0.196435 | 1.163171 | 2.565942 | 1.38E-17 | 5.69E-16 |
| LINC02561 | 0.037268 | 0.371913 | 3.318957 | 4.91E-13 | 7.20E-12 |
| AC005154.4 | 0.119027 | 0.29155 | 1.292457 | 0.000681 | 0.001402 |
| AC124016.3 | 0.670501 | 1.357799 | 1.017959 | 0.001972 | 0.003617 |
| AC011374.2 | 0.672666 | 1.398201 | 1.055609 | 1.87E-06 | 7.24E-06 |
| PCED1B-AS1 | 0.51566 | 1.863488 | 1.853514 | 1.08E-10 | 9.85E-10 |
| AC093278.2 | 2.40157 | 0.625731 | -1.94036 | 2.22E-18 | 1.10E-16 |
| LHX1-DT | 7.110053 | 1.31485 | -2.43496 | 2.89E-18 | 1.39E-16 |
| AL031710.1 | 10.33224 | 1.901066 | -2.44227 | 2.39E-17 | 8.98E-16 |
| AC010201.2 | 0.555303 | 1.247239 | 1.16739 | 4.20E-05 | 0.000116 |
| GARS1-DT | 0.462761 | 1.273827 | 1.46083 | 1.43E-08 | 9.01E-08 |
| ZKSCAN2-DT | 0.458818 | 1.149202 | 1.324639 | 1.73E-06 | 6.75E-06 |
| AL590226.1 | 1.42551 | 0.206077 | -2.79022 | 2.78E-19 | 1.71E-17 |
| SCAT2 | 0.28177 | 0.970943 | 1.784869 | 3.40E-08 | 1.97E-07 |
| LINC02019 | 0.209524 | 0.594464 | 1.504472 | 7.84E-08 | 4.21E-07 |
| AC106820.3 | 0.6684 | 1.51339 | 1.178999 | 5.72E-05 | 0.000154 |
| AC097641.2 | 0.231338 | 0.646517 | 1.482683 | 2.60E-08 | 1.54E-07 |
| AC022144.1 | 1.498295 | 3.799464 | 1.342474 | 1.77E-07 | 8.83E-07 |
| AC106739.1 | 0.164446 | 0.329019 | 1.000554 | 0.003949 | 0.006757 |
| AC022558.3 | 0.141489 | 0.361547 | 1.35349 | 1.22E-05 | 3.85E-05 |
| AC015802.5 | 0.284717 | 0.73788 | 1.373858 | 6.34E-05 | 0.000169 |
| AC008758.2 | 0.091998 | 0.258502 | 1.490499 | 2.39E-05 | 6.99E-05 |
| Z84485.1 | 0.292809 | 0.687728 | 1.231879 | 4.31E-05 | 0.000119 |
| NR2F1-AS1 | 1.040845 | 0.168117 | -2.63022 | 3.96E-19 | 2.29E-17 |
| AC092171.4 | 0.444217 | 1.77771 | 2.000683 | 6.79E-07 | 2.82E-06 |
| AC092954.1 | 0.055618 | 0.397813 | 2.838471 | 4.76E-05 | 0.00013 |
| AC015802.4 | 0.243316 | 0.509689 | 1.066788 | 1.00E-06 | 4.04E-06 |
| LINC01176 | 0.793948 | 2.486301 | 1.646885 | 3.69E-06 | 1.31E-05 |
| AC092296.1 | 1.028896 | 0.168175 | -2.61306 | 5.12E-12 | 6.06E-11 |
| GUSBP11 | 0.276116 | 0.711192 | 1.364963 | 0.005057 | 0.008452 |
| LINC02541 | 0.02737 | 0.259754 | 3.246455 | 2.30E-09 | 1.67E-08 |
| AC055822.1 | 0.828531 | 1.764719 | 1.090811 | 0.000101 | 0.000255 |
| AC066613.1 | 0.22156 | 0.498307 | 1.169336 | 2.23E-05 | 6.57E-05 |
| DRAIC | 3.645207 | 0.307029 | -3.56956 | 2.13E-17 | 8.37E-16 |
| LINC00894 | 0.226467 | 0.703998 | 1.636269 | 3.07E-06 | 1.12E-05 |
| CCR5AS | 0.198144 | 0.735898 | 1.892955 | 8.76E-11 | 8.14E-10 |
| AL355102.4 | 3.046832 | 0.370493 | -3.03979 | 3.61E-17 | 1.28E-15 |
| AC138207.5 | 1.117188 | 3.775871 | 1.756937 | 1.08E-13 | 1.97E-12 |
| AC005519.1 | 0.324906 | 0.769239 | 1.243411 | 6.45E-05 | 0.000171 |
| AC012213.4 | 0.082484 | 2.686404 | 5.02541 | 2.68E-13 | 4.25E-12 |
| AC005899.8 | 0.177716 | 0.522826 | 1.556756 | 2.83E-05 | 8.14E-05 |
| AL355388.1 | 0.1552 | 0.555619 | 1.839973 | 5.46E-09 | 3.70E-08 |
| MNX1-AS1 | 0.007708 | 0.243862 | 4.983614 | 3.50E-07 | 1.59E-06 |
| LINC02724 | 0.10063 | 0.214741 | 1.093532 | 2.41E-05 | 7.03E-05 |
| HNF4A-AS1 | 3.990762 | 0.344349 | -3.53472 | 1.37E-13 | 2.37E-12 |
| AL049555.1 | 2.581109 | 0.596872 | -2.1125 | 1.15E-14 | 2.49E-13 |
| AC010680.4 | 0.157864 | 0.447823 | 1.504244 | 1.96E-05 | 5.90E-05 |
| AC012186.2 | 0.218062 | 0.438373 | 1.007424 | 6.02E-05 | 0.000161 |
| AL589765.6 | 0.117749 | 0.294705 | 1.323551 | 0.000137 | 0.000333 |
| AL731577.2 | 0.630889 | 0.30423 | -1.05222 | 3.76E-10 | 3.14E-09 |
| LINC01788 | 1.454838 | 0.110085 | -3.72417 | 1.34E-22 | 1.66E-20 |
| CCND2-AS1 | 0.082803 | 0.516871 | 2.642057 | 1.99E-08 | 1.21E-07 |
| AC010245.2 | 0.470807 | 0.989534 | 1.071614 | 6.58E-07 | 2.76E-06 |
| AP001505.1 | 2.345672 | 6.264849 | 1.417278 | 5.42E-08 | 3.01E-07 |
| AC016957.2 | 0.458159 | 0.934129 | 1.027774 | 0.001698 | 0.003178 |
| PARD3-AS1 | 0.720675 | 4.081301 | 2.501608 | 1.92E-13 | 3.16E-12 |
| AC109460.1 | 0.163288 | 0.395922 | 1.277799 | 6.30E-09 | 4.16E-08 |
| AC098851.1 | 0.288488 | 0.823294 | 1.512899 | 0.000138 | 0.000335 |
| LINC01187 | 7.764402 | 1.321607 | -2.55458 | 4.74E-24 | 9.11E-22 |
| AC124312.3 | 0.931695 | 0.399248 | -1.22257 | 3.04E-10 | 2.58E-09 |
| AC048341.2 | 1.459142 | 3.272338 | 1.165201 | 6.56E-05 | 0.000174 |
| MMP2-AS1 | 0.055747 | 0.801531 | 3.845782 | 7.36E-12 | 8.54E-11 |
| AC009283.1 | 3.076581 | 7.343713 | 1.255182 | 5.94E-09 | 3.99E-08 |
| AC022509.3 | 0.489324 | 2.008935 | 2.037568 | 5.56E-11 | 5.52E-10 |
| AC127537.1 | 0.613999 | 1.529785 | 1.317021 | 9.15E-08 | 4.78E-07 |
| AC010487.1 | 0.376453 | 1.712993 | 2.185978 | 1.62E-05 | 4.95E-05 |
| AC073111.1 | 0.139197 | 0.355888 | 1.354292 | 6.25E-06 | 2.11E-05 |
| AC027702.2 | 0.266413 | 0.686642 | 1.365895 | 2.70E-09 | 1.92E-08 |
| AC010999.1 | 0.113448 | 0.243228 | 1.100278 | 0.000879 | 0.001771 |
| AC084824.5 | 1.247519 | 2.620179 | 1.070604 | 5.29E-07 | 2.27E-06 |
| AC002059.1 | 0.168862 | 0.53025 | 1.650825 | 0.000216 | 0.000494 |
| LINC00893 | 0.434289 | 0.941974 | 1.117032 | 0.000365 | 0.000804 |
| AC083880.1 | 0.746813 | 1.581107 | 1.082115 | 4.20E-07 | 1.85E-06 |
| AC109460.3 | 0.095415 | 0.265345 | 1.475584 | 7.84E-08 | 4.21E-07 |
| LINP1 | 0.205286 | 3.14416 | 3.936968 | 6.81E-16 | 1.87E-14 |
| LINC00924 | 3.974157 | 0.937507 | -2.08375 | 1.39E-14 | 2.92E-13 |
| CD44-AS1 | 0.062225 | 0.23745 | 1.932063 | 0.006827 | 0.01102 |
| NARF-IT1 | 0.166683 | 0.352907 | 1.082186 | 0.001284 | 0.002481 |
| AL157904.1 | 0.201369 | 0.709376 | 1.816706 | 4.20E-07 | 1.85E-06 |
| LINC01004 | 1.116829 | 2.767962 | 1.309415 | 0.000192 | 0.000445 |
| AC069294.1 | 0.044783 | 0.43442 | 3.278074 | 7.97E-08 | 4.27E-07 |
| AC004921.1 | 0.134062 | 0.640372 | 2.256005 | 7.07E-11 | 6.83E-10 |
| AC090772.3 | 0.309115 | 0.652198 | 1.077168 | 1.47E-05 | 4.52E-05 |
| AC004263.1 | 0.110703 | 0.346923 | 1.647927 | 0.001015 | 0.002013 |
| PLCG1-AS1 | 0.144617 | 0.39966 | 1.46654 | 9.41E-05 | 0.000239 |
| AL683807.1 | 0.065715 | 0.282327 | 2.103065 | 1.67E-05 | 5.06E-05 |
| AC148477.4 | 6.448801 | 0.524333 | -3.62047 | 4.25E-19 | 2.37E-17 |
| AL359504.1 | 0.317056 | 0.834877 | 1.396826 | 1.80E-06 | 6.99E-06 |
| LINC01126 | 0.215995 | 0.452053 | 1.065498 | 0.000391 | 0.000854 |
| AC092535.5 | 0.879592 | 21.90032 | 4.637973 | 5.46E-15 | 1.24E-13 |
| AC005534.1 | 0.123457 | 0.302837 | 1.294537 | 0.001828 | 0.003397 |
| AC018648.1 | 0.111258 | 0.361157 | 1.698716 | 0.000224 | 0.000512 |
| AL035665.1 | 0.011531 | 0.534468 | 5.534454 | 1.21E-11 | 1.35E-10 |
| AC244197.2 | 0.385445 | 0.85962 | 1.157173 | 0.004364 | 0.007408 |
| PRKAR1B-AS2 | 5.508253 | 24.28422 | 2.140352 | 2.27E-05 | 6.67E-05 |
| AC025048.4 | 0.203798 | 0.658237 | 1.691465 | 4.53E-14 | 8.60E-13 |
| AC027271.1 | 0.195661 | 0.534585 | 1.450063 | 1.25E-05 | 3.91E-05 |
| AC018809.1 | 0.270492 | 0.544588 | 1.009577 | 0.001663 | 0.003124 |
| AC104237.2 | 3.418357 | 0.333706 | -3.35665 | 3.80E-21 | 3.65E-19 |
| AL512652.1 | 0.114281 | 0.341919 | 1.581073 | 5.48E-06 | 1.86E-05 |
| LINC00472 | 4.693289 | 1.302543 | -1.84927 | 4.86E-16 | 1.38E-14 |
| AC087477.5 | 0.199734 | 0.848138 | 2.086219 | 2.20E-05 | 6.53E-05 |
| LINC02029 | 0.015313 | 0.230585 | 3.912443 | 2.50E-14 | 4.96E-13 |
| AL391840.1 | 0.572433 | 0.185433 | -1.62621 | 3.09E-10 | 2.60E-09 |
| AC009120.3 | 0.711159 | 1.602903 | 1.172444 | 0.000759 | 0.001546 |
| AC021491.2 | 0.061649 | 0.239086 | 1.955385 | 4.49E-07 | 1.97E-06 |
| AL031600.1 | 0.63973 | 1.315127 | 1.039667 | 7.02E-05 | 0.000184 |
| LINC01802 | 1.835016 | 0.398404 | -2.20349 | 4.58E-37 | 3.95E-34 |
| GATA2-AS1 | 1.42911 | 0.576744 | -1.30911 | 6.79E-13 | 9.62E-12 |
| Z98200.2 | 0.093768 | 0.278632 | 1.571193 | 9.04E-06 | 2.95E-05 |
| ITGA6-AS1 | 0.121567 | 0.305677 | 1.330259 | 1.32E-05 | 4.09E-05 |
| L3MBTL4-AS1 | 0.0497 | 0.384968 | 2.953409 | 5.70E-14 | 1.07E-12 |
| HIF1A-AS3 | 0.253675 | 0.562127 | 1.147915 | 0.001166 | 0.002268 |
| AP001830.1 | 0.835467 | 1.775507 | 1.087576 | 0.001429 | 0.002734 |
| AC093673.1 | 8.874594 | 26.4197 | 1.573861 | 3.19E-13 | 4.93E-12 |
| AL590369.1 | 0.909103 | 0.16711 | -2.44365 | 1.75E-17 | 7.05E-16 |
| LINC01150 | 0.243546 | 0.631878 | 1.375452 | 3.44E-06 | 1.24E-05 |
| AC127024.5 | 1.031948 | 2.260991 | 1.131585 | 5.74E-06 | 1.94E-05 |
| AC135178.6 | 0.415279 | 1.530788 | 1.882121 | 1.13E-13 | 2.02E-12 |
| AC112187.3 | 0.143865 | 0.466654 | 1.697634 | 1.96E-08 | 1.20E-07 |
| AL158196.1 | 0.123972 | 0.293999 | 1.245794 | 0.00683 | 0.01102 |
| TRG-AS1 | 0.12691 | 0.278594 | 1.134358 | 1.11E-05 | 3.54E-05 |
| UBE2Q1-AS1 | 0.143484 | 0.315411 | 1.136347 | 0.00054 | 0.001145 |
| AC025171.4 | 0.257068 | 1.255597 | 2.288154 | 7.98E-11 | 7.57E-10 |
| AC002091.2 | 0.153223 | 0.399884 | 1.383949 | 0.002386 | 0.004287 |
| AC020779.2 | 1.392788 | 0.546393 | -1.34996 | 1.79E-07 | 8.93E-07 |
| AC087742.1 | 0.123444 | 0.587019 | 2.249555 | 7.95E-09 | 5.19E-08 |
| HCG27 | 0.341092 | 0.813208 | 1.253462 | 0.000111 | 0.000276 |
| AP001628.1 | 0.190258 | 0.458788 | 1.269874 | 0.003272 | 0.005723 |
| AC079075.1 | 0.093775 | 0.226737 | 1.273736 | 0.002105 | 0.003825 |
| KIF1C-AS1 | 0.234461 | 0.548405 | 1.225893 | 1.23E-07 | 6.34E-07 |
| ATP2C2-AS1 | 0.085597 | 0.22177 | 1.37343 | 0.000325 | 0.000724 |
| AL513320.1 | 0.613793 | 1.494996 | 1.284319 | 0.000549 | 0.001159 |
| AC022382.1 | 0.162846 | 0.410482 | 1.333809 | 2.69E-06 | 9.99E-06 |
| AL138976.2 | 0.905717 | 2.071605 | 1.193617 | 1.93E-07 | 9.43E-07 |
| IBA57-DT | 0.241035 | 0.500369 | 1.053746 | 0.003199 | 0.005607 |
| AL359881.2 | 0.195368 | 0.563283 | 1.527668 | 0.000434 | 0.000936 |
| AC130650.2 | 0.144875 | 0.324332 | 1.162666 | 6.08E-05 | 0.000162 |
| AL080317.2 | 0.533663 | 1.230152 | 1.204836 | 2.35E-05 | 6.89E-05 |
| AL117336.1 | 1.8749 | 0.766591 | -1.29029 | 0.000182 | 0.000422 |
| SLC9A3-AS1 | 3.58438 | 12.02591 | 1.74635 | 3.85E-05 | 0.000108 |
| NCBP2-AS1 | 0.108705 | 0.348916 | 1.682464 | 3.53E-07 | 1.59E-06 |
| AP001189.1 | 0.871373 | 0.200215 | -2.12174 | 6.92E-16 | 1.87E-14 |
| AL133353.1 | 0.238374 | 0.655679 | 1.459764 | 2.76E-07 | 1.30E-06 |
| LINC00645 | 6.292154 | 0.293658 | -4.42135 | 1.46E-19 | 1.05E-17 |
| AP000907.2 | 0.106508 | 0.268212 | 1.33241 | 0.005428 | 0.009002 |
| AC092078.2 | 2.452729 | 0.041587 | -5.88211 | 1.69E-37 | 2.92E-34 |
| AC006480.3 | 0.362912 | 0.794643 | 1.130689 | 0.000618 | 0.001288 |
| AC004253.1 | 0.304591 | 0.928295 | 1.607709 | 5.93E-07 | 2.50E-06 |
| AL590560.3 | 0.908919 | 2.319265 | 1.351443 | 0.002026 | 0.003701 |
| GIHCG | 4.140305 | 9.95848 | 1.266188 | 1.07E-12 | 1.47E-11 |
| LINC01230 | 2.344935 | 0.140852 | -4.0573 | 1.62E-28 | 7.00E-26 |
| AC002091.1 | 0.185004 | 0.549008 | 1.56927 | 2.07E-05 | 6.16E-05 |
| AC008105.1 | 0.136727 | 0.289821 | 1.083861 | 0.001531 | 0.002907 |
| MHENCR | 4.507484 | 9.834869 | 1.125583 | 9.99E-06 | 3.23E-05 |
| AL359921.1 | 0.273914 | 0.614861 | 1.166538 | 3.52E-06 | 1.26E-05 |
| NSMCE1-DT | 0.098643 | 0.270512 | 1.455398 | 6.06E-08 | 3.31E-07 |
| ZNF582-AS1 | 2.406567 | 0.965659 | -1.31739 | 2.65E-15 | 6.64E-14 |
| MMP25-AS1 | 0.483215 | 1.680517 | 1.798169 | 2.20E-13 | 3.58E-12 |
| DLG3-AS1 | 0.189072 | 0.509817 | 1.431044 | 2.67E-08 | 1.57E-07 |
| AC012366.1 | 0.638037 | 0.263619 | -1.27519 | 5.27E-07 | 2.27E-06 |
| LINC02285 | 0.098433 | 0.303594 | 1.624931 | 5.09E-08 | 2.83E-07 |
| AC067838.1 | 1.28978 | 2.626609 | 1.026076 | 9.93E-07 | 4.02E-06 |
| AC103740.1 | 0.089713 | 0.284613 | 1.665607 | 2.00E-08 | 1.22E-07 |
| AL731567.1 | 0.116298 | 1.223546 | 3.395167 | 6.15E-14 | 1.14E-12 |
| AC024267.4 | 0.197717 | 0.418065 | 1.080289 | 0.000487 | 0.001041 |
| AC120114.1 | 0.347126 | 0.770417 | 1.150181 | 3.04E-05 | 8.64E-05 |
| AC145423.2 | 0.840275 | 1.756529 | 1.063793 | 0.003348 | 0.005844 |
| AC099850.4 | 0.370366 | 1.066946 | 1.526465 | 2.41E-05 | 7.03E-05 |
| AC107057.1 | 4.036914 | 0.085464 | -5.56179 | 8.42E-24 | 1.45E-21 |
| AC008735.2 | 0.951357 | 2.194743 | 1.205993 | 5.82E-05 | 0.000156 |
| FSIP2-AS1 | 0.098357 | 0.246109 | 1.3232 | 0.000512 | 0.001092 |
| LINC02381 | 34.35839 | 11.52462 | -1.57594 | 1.40E-13 | 2.39E-12 |
| AC005306.1 | 0.170594 | 0.348345 | 1.029952 | 0.005758 | 0.009477 |
| AC074124.1 | 0.23204 | 3.897922 | 4.070259 | 2.11E-10 | 1.85E-09 |
| LINC02154 | 0.011687 | 1.295822 | 6.792764 | 1.03E-06 | 4.13E-06 |
| AC007038.1 | 0.61659 | 1.492264 | 1.275121 | 2.09E-06 | 7.99E-06 |
| AC008870.2 | 0.25463 | 0.668745 | 1.393057 | 5.13E-07 | 2.22E-06 |
| LINC02298 | 1.121956 | 2.35616 | 1.070421 | 3.91E-06 | 1.38E-05 |
| AL121772.1 | 0.071049 | 0.349343 | 2.297755 | 4.95E-08 | 2.77E-07 |
| AC024022.1 | 1.156798 | 0.270455 | -2.09668 | 7.87E-17 | 2.57E-15 |
| AC126118.1 | 0.204141 | 1.086585 | 2.412161 | 1.92E-08 | 1.18E-07 |
| LINC01736 | 0.04839 | 0.8661 | 4.161764 | 3.33E-12 | 4.15E-11 |
| LINC02082 | 0.085908 | 0.364332 | 2.084388 | 0.000163 | 0.000384 |
| AC004908.3 | 0.373706 | 0.964901 | 1.368479 | 4.43E-06 | 1.53E-05 |
| AC006435.2 | 0.512782 | 1.304632 | 1.347224 | 7.14E-05 | 0.000187 |
| ARHGAP31-AS1 | 0.456347 | 1.219326 | 1.417881 | 1.42E-07 | 7.18E-07 |
| AC091729.3 | 1.59126 | 3.570575 | 1.165987 | 8.37E-10 | 6.61E-09 |
| AC040162.3 | 0.174244 | 0.407439 | 1.225475 | 2.86E-08 | 1.67E-07 |
| AL355297.2 | 0.256823 | 0.523008 | 1.026058 | 0.00022 | 0.000503 |
| LINC01587 | 0.067169 | 0.422271 | 2.652308 | 1.79E-09 | 1.33E-08 |
| AC073534.2 | 0.240394 | 0.674144 | 1.487656 | 3.22E-06 | 1.17E-05 |
| AC092115.4 | 0.097112 | 0.22476 | 1.210668 | 0.000521 | 0.001108 |
| AC113139.1 | 0.237288 | 0.51506 | 1.118099 | 0.003523 | 0.006112 |
| U91328.3 | 0.232296 | 0.682505 | 1.554875 | 1.43E-06 | 5.65E-06 |
| AC026401.3 | 1.451573 | 4.951266 | 1.770181 | 3.63E-17 | 1.28E-15 |
| SCGB1B2P | 0.749174 | 1.752553 | 1.226085 | 1.21E-05 | 3.83E-05 |
| AP006621.2 | 0.848305 | 2.130998 | 1.328873 | 0.000151 | 0.00036 |
| AC024940.6 | 0.154215 | 0.334794 | 1.118327 | 5.40E-07 | 2.30E-06 |
| AC244153.1 | 1.361986 | 0.448345 | -1.60303 | 3.45E-17 | 1.27E-15 |
| LINC01748 | 0.014186 | 0.86638 | 5.932414 | 3.33E-12 | 4.15E-11 |
| AC092894.1 | 1.388705 | 3.802993 | 1.453395 | 2.20E-06 | 8.32E-06 |
| AC100814.2 | 1.086631 | 2.194782 | 1.014216 | 1.10E-05 | 3.51E-05 |
| AC009690.2 | 0.246612 | 0.513377 | 1.057773 | 1.35E-07 | 6.86E-07 |
| AC090948.3 | 0.372011 | 0.835978 | 1.16812 | 1.29E-05 | 4.03E-05 |
| AC093382.1 | 0.099615 | 0.2838 | 1.510446 | 3.90E-05 | 0.000109 |
| AL132655.2 | 0.069661 | 0.264181 | 1.923112 | 0.001541 | 0.002923 |
| AL445222.2 | 0.287633 | 0.807545 | 1.489313 | 8.81E-10 | 6.92E-09 |
| AC093424.1 | 0.077735 | 0.259619 | 1.739753 | 0.004949 | 0.008295 |
| AC067852.3 | 0.240979 | 0.52691 | 1.128653 | 0.002493 | 0.00446 |
| AC002553.1 | 0.669246 | 1.577861 | 1.23736 | 1.87E-06 | 7.24E-06 |
| AC211476.4 | 0.091942 | 0.235587 | 1.357462 | 4.01E-05 | 0.000111 |
| AC009120.2 | 1.010139 | 2.971657 | 1.556714 | 8.87E-07 | 3.62E-06 |
| LINC00240 | 0.181233 | 0.532997 | 1.556284 | 1.12E-09 | 8.55E-09 |
| LINC01606 | 2.434997 | 0.155072 | -3.97291 | 6.32E-22 | 7.28E-20 |
| AC099791.2 | 0.121307 | 0.459351 | 1.92093 | 1.97E-05 | 5.92E-05 |
| CYTOR | 1.391379 | 2.801115 | 1.009486 | 4.66E-07 | 2.04E-06 |
| AL365181.3 | 0.376905 | 10.01206 | 4.731394 | 6.83E-17 | 2.27E-15 |
| TBX2-AS1 | 3.881447 | 1.582002 | -1.29484 | 1.18E-12 | 1.61E-11 |
| AC092338.1 | 0.179037 | 0.500076 | 1.481885 | 8.12E-05 | 0.000209 |
| DTX2P1-UPK3BP1-PMS2P11 | 0.149914 | 0.318575 | 1.087492 | 2.40E-06 | 9.06E-06 |
| LINC00342 | 1.089915 | 3.47922 | 1.674549 | 8.78E-07 | 3.59E-06 |
| CRNDE | 2.387188 | 12.12471 | 2.344566 | 4.07E-12 | 4.96E-11 |
| LINC01569 | 1.62044 | 4.517242 | 1.479057 | 1.05E-09 | 8.10E-09 |
| LINC01127 | 0.561226 | 0.168203 | -1.73838 | 3.55E-11 | 3.61E-10 |
| AC005332.5 | 1.223233 | 2.819281 | 1.204628 | 4.18E-09 | 2.89E-08 |
| LINC02739 | 0.082563 | 0.243224 | 1.558722 | 2.05E-08 | 1.24E-07 |
| AC141002.1 | 0.268972 | 0.919041 | 1.772671 | 9.23E-09 | 5.95E-08 |
| AC007342.4 | 1.672075 | 0.471317 | -1.82687 | 1.44E-12 | 1.93E-11 |
| AC010998.2 | 0.096095 | 0.221679 | 1.205934 | 0.001035 | 0.002048 |
| LINC00939 | 0.051467 | 0.237286 | 2.204902 | 9.81E-07 | 3.98E-06 |
| LINC02535 | 2.717733 | 1.226897 | -1.14739 | 9.97E-05 | 0.000251 |
| YEATS2-AS1 | 0.110882 | 0.228291 | 1.04185 | 0.000137 | 0.000333 |
| MACORIS | 0.191381 | 0.800887 | 2.065153 | 1.67E-09 | 1.25E-08 |
| AC245884.8 | 0.52831 | 1.18423 | 1.164494 | 0.000152 | 0.000364 |
| AL008635.1 | 0.248926 | 0.552838 | 1.151142 | 0.00015 | 0.000359 |
| AC136475.2 | 2.097233 | 4.248046 | 1.018312 | 2.57E-05 | 7.43E-05 |
| AC012557.2 | 0.09261 | 0.218657 | 1.239428 | 0.020857 | 0.030286 |
| IDH2-DT | 1.63479 | 0.067108 | -4.60648 | 4.87E-27 | 1.68E-24 |
| AC002398.1 | 1.018117 | 2.364503 | 1.215633 | 1.38E-09 | 1.04E-08 |
| KCNIP2-AS1 | 0.23439 | 0.538096 | 1.198952 | 7.19E-09 | 4.71E-08 |
| AL133215.1 | 0.106487 | 0.221889 | 1.059156 | 0.022148 | 0.032 |
| LINC00997 | 1.350496 | 3.306043 | 1.291616 | 8.92E-10 | 6.97E-09 |
| AC073316.2 | 0.315827 | 1.930241 | 2.611573 | 2.58E-12 | 3.30E-11 |
| LINC01556 | 0.089096 | 0.242522 | 1.444676 | 0.000961 | 0.001915 |
| Z98884.2 | 0.572338 | 1.273607 | 1.153981 | 1.03E-08 | 6.60E-08 |
| LINC00323 | 1.271996 | 0.323558 | -1.975 | 7.25E-11 | 6.96E-10 |
| AL139123.1 | 0.143475 | 0.612554 | 2.094038 | 5.63E-08 | 3.10E-07 |
| LINC00845 | 0.584076 | 0.16641 | -1.81141 | 3.92E-07 | 1.75E-06 |
| AC068790.7 | 0.113609 | 0.286505 | 1.334482 | 5.83E-05 | 0.000156 |
| LIPE-AS1 | 0.223014 | 0.562244 | 1.334062 | 2.90E-11 | 3.05E-10 |
| AC073957.3 | 0.687968 | 1.652541 | 1.264273 | 0.000984 | 0.001954 |
| AL645940.1 | 0.170378 | 0.448743 | 1.397149 | 0.000168 | 0.000395 |
| AC008764.6 | 0.290447 | 0.660881 | 1.186116 | 2.15E-06 | 8.19E-06 |
| Z98257.1 | 0.010677 | 0.456992 | 5.419576 | 3.39E-14 | 6.50E-13 |
| AC023906.5 | 0.160626 | 0.438291 | 1.448186 | 9.92E-05 | 0.00025 |
| LINC00885 | 1.033198 | 0.192943 | -2.42087 | 6.76E-18 | 3.00E-16 |
| AC009097.2 | 0.203676 | 0.872698 | 2.099205 | 1.56E-06 | 6.14E-06 |
| LINC02604 | 1.782503 | 5.617821 | 1.656106 | 1.91E-07 | 9.36E-07 |
| AC104564.5 | 0.079654 | 0.265869 | 1.738892 | 1.39E-07 | 7.06E-07 |
| AL049795.1 | 0.139633 | 0.327151 | 1.228317 | 4.48E-05 | 0.000123 |
| LINC01612 | 2.46144 | 0.270765 | -3.18439 | 2.34E-25 | 5.05E-23 |
| AL078587.1 | 0.101555 | 0.278187 | 1.453798 | 0.000167 | 0.000392 |
| AC104237.3 | 5.888736 | 0.462778 | -3.66957 | 4.97E-21 | 4.52E-19 |
| AL445645.1 | 0.290966 | 0.689288 | 1.244257 | 5.37E-06 | 1.82E-05 |
| KLHL6-AS1 | 0.416977 | 0.20277 | -1.04012 | 0.000146 | 0.000352 |
| AC069209.1 | 0.069643 | 0.305635 | 2.133749 | 5.04E-09 | 3.45E-08 |
| AL513218.1 | 0.230292 | 0.681269 | 1.564758 | 2.78E-06 | 1.02E-05 |
| AL031705.1 | 0.12517 | 0.348306 | 1.476469 | 4.99E-06 | 1.71E-05 |
| AP002761.3 | 0.653046 | 0.311051 | -1.07003 | 3.01E-13 | 4.69E-12 |
| AC016737.1 | 0.182018 | 0.507516 | 1.479377 | 4.50E-05 | 0.000123 |
| AL355803.1 | 1.26861 | 0.275657 | -2.2023 | 5.51E-17 | 1.87E-15 |
| IGBP1-AS1 | 0.137228 | 0.345056 | 1.330257 | 6.89E-05 | 0.000181 |
| AC107021.1 | 0.145352 | 0.340898 | 1.229795 | 0.02885 | 0.040729 |
| AC079907.1 | 0.208336 | 0.461713 | 1.148087 | 9.36E-05 | 0.000238 |
| AC005840.2 | 0.265489 | 0.722914 | 1.445169 | 6.65E-07 | 2.77E-06 |
| AC027601.2 | 0.149834 | 0.380388 | 1.34411 | 3.16E-07 | 1.45E-06 |
| SNHG22 | 0.237166 | 0.514515 | 1.117319 | 1.00E-06 | 4.04E-06 |
| AL132780.1 | 1.419822 | 0.403804 | -1.81398 | 2.12E-14 | 4.31E-13 |
| AC253576.2 | 0.248428 | 0.552301 | 1.15263 | 0.000133 | 0.000325 |
| AC004830.2 | 0.153819 | 0.410518 | 1.416206 | 0.007116 | 0.011417 |
| AC010201.1 | 0.503507 | 1.326185 | 1.397198 | 0.000113 | 0.00028 |
| AC005104.1 | 0.395269 | 0.903451 | 1.192612 | 0.000582 | 0.001222 |
| AC132872.2 | 0.114584 | 0.384122 | 1.745159 | 2.81E-06 | 1.03E-05 |
| SCOC-AS1 | 0.252153 | 0.69794 | 1.468804 | 2.93E-10 | 2.51E-09 |
| AC000123.1 | 0.736605 | 2.1832 | 1.567482 | 1.32E-10 | 1.19E-09 |
| AL590708.1 | 0.087506 | 0.259681 | 1.569282 | 1.88E-06 | 7.26E-06 |
| AC103706.1 | 0.336316 | 1.058142 | 1.653645 | 1.24E-11 | 1.37E-10 |
| AC015849.3 | 0.691357 | 1.496132 | 1.113734 | 0.001225 | 0.002376 |
| AC245060.6 | 0.126458 | 0.257676 | 1.0269 | 0.005653 | 0.00934 |
| AC067930.4 | 0.064619 | 0.280872 | 2.119893 | 8.19E-06 | 2.71E-05 |
| AP003119.2 | 0.497662 | 1.393381 | 1.485352 | 1.93E-05 | 5.81E-05 |
| AP001189.3 | 2.882483 | 0.583331 | -2.30493 | 1.21E-17 | 5.12E-16 |
| APCDD1L-DT | 1.265631 | 0.101509 | -3.64018 | 1.74E-19 | 1.20E-17 |
| AC104564.3 | 0.315989 | 0.889307 | 1.492809 | 1.47E-06 | 5.80E-06 |
| AL022069.1 | 0.615183 | 0.240697 | -1.3538 | 3.32E-06 | 1.20E-05 |
| AC007342.5 | 0.938779 | 0.442621 | -1.08471 | 1.59E-08 | 9.82E-08 |
| AL513477.2 | 0.583818 | 1.886584 | 1.692185 | 5.51E-07 | 2.34E-06 |
| C5orf34-AS1 | 0.192237 | 0.764578 | 1.991774 | 8.61E-06 | 2.83E-05 |
| AP001767.3 | 0.25417 | 0.799298 | 1.652942 | 6.29E-05 | 0.000167 |
| AL354760.1 | 0.256735 | 0.667887 | 1.379324 | 0.00012 | 0.000298 |
| TCL6 | 1.601191 | 0.07226 | -4.4698 | 1.47E-18 | 7.48E-17 |
| AC103691.1 | 0.800663 | 1.739187 | 1.119146 | 0.001351 | 0.002606 |
| AC009318.4 | 0.322893 | 0.660255 | 1.031966 | 0.01452 | 0.021711 |
| AC004846.2 | 0.324958 | 1.051997 | 1.694805 | 4.10E-06 | 1.44E-05 |
| CR936218.1 | 0.375724 | 0.844032 | 1.167625 | 0.000701 | 0.001437 |
| LINC02449 | 0.346826 | 0.723349 | 1.060482 | 2.09E-05 | 6.21E-05 |
| AL391121.1 | 4.504826 | 1.783387 | -1.33685 | 1.48E-14 | 3.08E-13 |
| AC004148.1 | 0.912477 | 2.822614 | 1.629172 | 2.87E-07 | 1.34E-06 |
| AL110115.2 | 0.105493 | 0.24187 | 1.197086 | 0.012883 | 0.019562 |
| MCF2L-AS1 | 2.37814 | 0.608611 | -1.96624 | 1.13E-15 | 2.92E-14 |
| AC048382.2 | 0.315174 | 0.788195 | 1.322406 | 0.001684 | 0.003157 |
| LINC02586 | 1.02736 | 0.174646 | -2.55643 | 8.77E-18 | 3.79E-16 |
| AC026356.2 | 0.181204 | 0.389359 | 1.103487 | 0.001251 | 0.002424 |
| AC021218.1 | 1.378429 | 3.359184 | 1.285086 | 0.00292 | 0.005155 |
| AP003352.1 | 0.575298 | 1.377156 | 1.25931 | 2.34E-07 | 1.12E-06 |
| AC092375.2 | 0.139219 | 0.308227 | 1.146638 | 0.006009 | 0.009824 |
| AC005324.5 | 0.09376 | 0.287537 | 1.616711 | 4.10E-05 | 0.000114 |
| HAGLR | 7.078421 | 3.000089 | -1.23842 | 6.22E-13 | 8.88E-12 |
| AL139280.1 | 6.452837 | 0.444417 | -3.85995 | 1.13E-22 | 1.51E-20 |
| AL080317.1 | 0.211371 | 1.164813 | 2.462247 | 1.30E-15 | 3.30E-14 |
| STAG3L5P-PVRIG2P-PILRB | 0.578068 | 1.816332 | 1.651716 | 9.15E-07 | 3.72E-06 |
| LINC01508 | 1.385692 | 3.494439 | 1.334454 | 2.70E-06 | 9.99E-06 |
| AC079322.1 | 0.184565 | 0.38311 | 1.05363 | 9.80E-05 | 0.000248 |
| AC012213.1 | 0.029396 | 0.973861 | 5.050001 | 4.52E-13 | 6.73E-12 |
| AL117379.1 | 0.62173 | 1.618253 | 1.380077 | 4.31E-06 | 1.49E-05 |
| DDX11-AS1 | 0.108363 | 0.45686 | 2.075876 | 3.96E-17 | 1.37E-15 |
| AC005785.1 | 0.256272 | 0.580777 | 1.180306 | 0.000203 | 0.000469 |
| TMEM246-AS1 | 4.349983 | 0.822362 | -2.40317 | 1.05E-12 | 1.45E-11 |
| AC011472.2 | 0.128079 | 0.493093 | 1.944826 | 4.48E-11 | 4.47E-10 |
| AC005332.3 | 3.602086 | 9.357643 | 1.377313 | 9.74E-11 | 9.00E-10 |
| AL353600.1 | 0.142617 | 0.412428 | 1.531999 | 7.35E-05 | 0.000192 |
| AL355385.1 | 0.376673 | 0.896427 | 1.250873 | 0.001849 | 0.003428 |
| AL359697.1 | 0.203723 | 0.426109 | 1.064611 | 0.0015 | 0.002857 |
| AC073611.1 | 0.379552 | 1.292247 | 1.767511 | 3.38E-14 | 6.50E-13 |
| AL451050.2 | 0.166383 | 0.452236 | 1.442568 | 2.44E-05 | 7.07E-05 |
| ADAMTS9-AS1 | 14.5136 | 33.83461 | 1.221094 | 3.58E-06 | 1.28E-05 |
| AC004951.4 | 0.089385 | 0.250534 | 1.486898 | 2.15E-07 | 1.04E-06 |
| AP001453.4 | 0.591926 | 1.267341 | 1.098316 | 4.47E-08 | 2.52E-07 |
| AC087289.2 | 0.191941 | 0.546974 | 1.510808 | 3.29E-08 | 1.91E-07 |
| AC022075.1 | 0.408956 | 1.030079 | 1.332736 | 1.16E-09 | 8.80E-09 |
| AL121890.5 | 0.118356 | 0.277063 | 1.227076 | 0.006498 | 0.010544 |
| AL590764.1 | 0.149581 | 0.501056 | 1.744045 | 6.08E-09 | 4.06E-08 |
| AC133528.1 | 0.196414 | 0.617614 | 1.65281 | 2.02E-05 | 6.05E-05 |
| AL731569.1 | 0.22329 | 0.528458 | 1.242869 | 1.16E-06 | 4.63E-06 |
| AL691482.4 | 0.722967 | 2.865414 | 1.986742 | 4.22E-06 | 1.47E-05 |
| RAMP2-AS1 | 0.42695 | 0.198381 | -1.10579 | 1.08E-13 | 1.97E-12 |
| AC010883.1 | 0.899807 | 1.998147 | 1.150975 | 0.000419 | 0.000909 |
| LINC01410 | 0.253634 | 0.5179 | 1.029928 | 0.000175 | 0.000409 |
| AL844908.2 | 0.474651 | 0.958921 | 1.014545 | 0.021363 | 0.030943 |
| ITGB2-AS1 | 0.2655 | 1.178373 | 2.150011 | 4.21E-10 | 3.48E-09 |
| MAP3K5-AS1 | 0.121315 | 0.349266 | 1.525566 | 5.89E-06 | 1.99E-05 |
| MAFG-DT | 1.536855 | 3.759642 | 1.290614 | 2.07E-08 | 1.24E-07 |
| AC005046.2 | 2.027127 | 6.393137 | 1.657088 | 0.000452 | 0.000972 |
| AC121757.1 | 0.175974 | 0.60419 | 1.779637 | 1.12E-05 | 3.58E-05 |
| AC092809.5 | 0.087808 | 0.376744 | 2.101152 | 3.37E-11 | 3.44E-10 |
| AC011899.3 | 0.047396 | 0.597108 | 3.65515 | 2.72E-15 | 6.71E-14 |
| LINC01191 | 0.142569 | 0.456975 | 1.680451 | 0.000725 | 0.001485 |
| AL158063.1 | 0.195559 | 0.531325 | 1.441991 | 0.000108 | 0.00027 |
| AL356740.1 | 0.967828 | 0.146243 | -2.72638 | 8.62E-19 | 4.51E-17 |
| AC020658.5 | 0.126098 | 0.478823 | 1.924948 | 2.51E-07 | 1.20E-06 |
| AC145098.1 | 0.216299 | 0.633594 | 1.550533 | 7.53E-08 | 4.08E-07 |
| AC002456.1 | 0.320133 | 0.841114 | 1.393632 | 0.0007 | 0.001437 |
| AC010761.1 | 0.515721 | 1.137945 | 1.141767 | 5.81E-07 | 2.46E-06 |
| AC018904.1 | 2.534834 | 8.615131 | 1.764982 | 2.71E-10 | 2.34E-09 |
| AL133371.2 | 0.476425 | 1.045596 | 1.134005 | 0.000176 | 0.000412 |
| AC124319.1 | 0.115639 | 0.367953 | 1.669898 | 0.002198 | 0.003968 |
| AC005387.1 | 0.145766 | 0.530954 | 1.864931 | 1.50E-08 | 9.41E-08 |
| AC004076.2 | 0.13026 | 0.273905 | 1.072279 | 0.000685 | 0.001409 |
| AC010719.1 | 0.360781 | 0.754035 | 1.063509 | 0.000313 | 0.0007 |
| AL022322.1 | 0.35004 | 1.268913 | 1.858003 | 2.20E-08 | 1.31E-07 |
| AC009185.1 | 0.812112 | 0.21222 | -1.93612 | 3.23E-13 | 4.94E-12 |
| AC254629.1 | 0.011219 | 0.310605 | 4.791015 | 9.32E-12 | 1.06E-10 |
| AC009812.4 | 0.754691 | 1.744189 | 1.208599 | 1.45E-08 | 9.08E-08 |
| NRAD1 | 1.879483 | 0.507983 | -1.88748 | 4.87E-15 | 1.14E-13 |
| AC106782.5 | 0.742382 | 1.869385 | 1.332331 | 4.10E-10 | 3.41E-09 |
| Z73429.1 | 0.127344 | 0.278882 | 1.130921 | 0.000312 | 0.000699 |
| AC123595.1 | 0.690429 | 0.208823 | -1.72522 | 8.06E-13 | 1.12E-11 |
| LINC01160 | 0.135738 | 0.312997 | 1.20532 | 7.63E-05 | 0.000197 |
| AL662844.3 | 0.173473 | 0.450247 | 1.376003 | 5.12E-05 | 0.000139 |
| AC004801.6 | 0.206876 | 0.431697 | 1.061252 | 1.51E-08 | 9.45E-08 |
| LINC02061 | 7.538901 | 0.176369 | -5.41769 | 1.14E-19 | 8.99E-18 |
| CYP4F26P | 0.027051 | 0.258617 | 3.257058 | 5.48E-07 | 2.33E-06 |
| AP002954.1 | 0.059581 | 0.724878 | 3.604822 | 2.38E-12 | 3.07E-11 |
| AC096642.1 | 0.110196 | 0.233462 | 1.083116 | 0.002256 | 0.004061 |
| AC008622.2 | 0.18241 | 0.381957 | 1.066224 | 0.000465 | 0.000999 |
| AC093010.2 | 23.87998 | 51.10471 | 1.097655 | 4.60E-10 | 3.79E-09 |
| DICER1-AS1 | 1.40968 | 3.283467 | 1.219852 | 3.69E-05 | 0.000103 |
| AP000697.1 | 1.828418 | 0.111152 | -4.03999 | 9.06E-16 | 2.37E-14 |
| MROCKI | 0.390653 | 3.396828 | 3.120228 | 2.24E-12 | 2.90E-11 |
| LINC00173 | 0.380963 | 2.397087 | 2.65356 | 6.30E-09 | 4.16E-08 |
| AC012510.1 | 1.02601 | 2.130294 | 1.054008 | 4.43E-06 | 1.53E-05 |
| U62317.2 | 2.610923 | 7.269681 | 1.477332 | 2.27E-11 | 2.42E-10 |
| AC093495.1 | 0.319842 | 0.643409 | 1.008376 | 0.000425 | 0.000919 |
| AL121894.2 | 0.339846 | 0.955555 | 1.491456 | 8.57E-08 | 4.53E-07 |
| AC138932.6 | 0.258096 | 0.564279 | 1.128501 | 0.001674 | 0.00314 |
| FUT8-AS1 | 0.224682 | 0.622881 | 1.471069 | 1.75E-06 | 6.80E-06 |
| AC105219.1 | 0.03711 | 0.35296 | 3.249636 | 8.37E-08 | 4.44E-07 |
| AC112491.1 | 0.805793 | 1.657474 | 1.040505 | 1.28E-05 | 4.00E-05 |
| AP000696.1 | 4.390311 | 0.13704 | -5.00165 | 2.66E-19 | 1.70E-17 |
| AL355987.4 | 0.180436 | 0.376021 | 1.059328 | 0.011792 | 0.018032 |
| AC005363.2 | 0.109117 | 0.239941 | 1.136805 | 0.004168 | 0.007096 |
| AC016737.2 | 0.172311 | 0.366797 | 1.089968 | 0.003957 | 0.006763 |
| LINC02677 | 0.310991 | 1.231967 | 1.986017 | 8.73E-05 | 0.000223 |
| ZNF436-AS1 | 0.816365 | 1.659025 | 1.023049 | 9.45E-06 | 3.07E-05 |
| LINC02471 | 3.060377 | 30.79615 | 3.330968 | 4.91E-13 | 7.20E-12 |
| AC138150.2 | 0.294551 | 1.069437 | 1.860263 | 1.34E-10 | 1.20E-09 |
| AC130343.2 | 0.189288 | 0.461613 | 1.286098 | 1.31E-05 | 4.08E-05 |
| AC010618.2 | 0.21904 | 0.438764 | 1.002247 | 0.000252 | 0.000571 |
| AC093726.2 | 0.973979 | 3.014237 | 1.62983 | 6.15E-09 | 4.09E-08 |
| AC099792.1 | 0.035684 | 1.53058 | 5.42266 | 2.32E-11 | 2.46E-10 |
| AC005261.3 | 1.467547 | 3.378174 | 1.202837 | 1.14E-10 | 1.03E-09 |
| AC004908.1 | 0.623783 | 1.335481 | 1.098243 | 0.000328 | 0.000729 |
| AC073842.2 | 0.34737 | 0.836708 | 1.268251 | 7.69E-06 | 2.55E-05 |
| AC107464.2 | 1.211757 | 5.651973 | 2.221654 | 3.66E-09 | 2.57E-08 |
| AC092119.2 | 0.284223 | 1.180693 | 2.054537 | 2.67E-08 | 1.57E-07 |
| AC004223.4 | 0.16155 | 0.358373 | 1.149482 | 0.000391 | 0.000854 |
| AL031768.1 | 0.16021 | 0.401744 | 1.326312 | 3.70E-07 | 1.66E-06 |
| AC084782.3 | 0.449079 | 1.220511 | 1.442443 | 4.97E-06 | 1.71E-05 |
| AC004923.4 | 0.221304 | 0.891736 | 2.010586 | 6.98E-11 | 6.77E-10 |
| GAS6-DT | 1.727899 | 0.37484 | -2.20467 | 1.34E-16 | 4.08E-15 |
| AL161452.1 | 0.102035 | 0.285167 | 1.482742 | 6.72E-07 | 2.80E-06 |
| AC074212.1 | 0.397543 | 0.81765 | 1.040373 | 0.000133 | 0.000325 |
| SEMA6A-AS1 | 0.2071 | 0.489579 | 1.241216 | 0.000517 | 0.0011 |
| AC011481.1 | 0.446877 | 0.935186 | 1.065375 | 9.80E-05 | 0.000248 |
| LINC01857 | 0.234978 | 2.145931 | 3.191006 | 7.44E-11 | 7.10E-10 |
| LINC02611 | 0.088836 | 0.353581 | 1.992829 | 2.98E-11 | 3.10E-10 |
| AC013468.1 | 0.251963 | 0.523595 | 1.055241 | 0.001745 | 0.003256 |
| AL355075.2 | 0.280221 | 0.573142 | 1.032326 | 0.003501 | 0.00608 |
| AL390728.6 | 2.448778 | 6.963424 | 1.507734 | 2.06E-09 | 1.51E-08 |
| AC006017.1 | 0.298437 | 1.491174 | 2.320949 | 4.65E-06 | 1.60E-05 |
| AC060766.4 | 1.107759 | 2.522342 | 1.18712 | 9.45E-06 | 3.07E-05 |
| ERVE-1 | 2.787322 | 0.169559 | -4.03902 | 2.38E-23 | 3.74E-21 |
| AC005387.2 | 0.173021 | 0.349566 | 1.014617 | 0.000689 | 0.001415 |
| AC102953.2 | 0.900395 | 1.842066 | 1.032694 | 7.51E-05 | 0.000195 |
| LINC01503 | 10.36898 | 3.988901 | -1.37821 | 1.10E-13 | 1.98E-12 |
| AC008105.3 | 0.121249 | 0.609368 | 2.329338 | 2.94E-11 | 3.08E-10 |
| AL450384.2 | 0.5326 | 1.356029 | 1.348263 | 8.58E-05 | 0.00022 |
| AC068790.4 | 0.124128 | 0.25845 | 1.058055 | 0.001905 | 0.003514 |
| AC015813.4 | 0.256958 | 0.561056 | 1.126613 | 0.008302 | 0.013114 |
| BTG3-AS1 | 0.401002 | 0.183067 | -1.13124 | 1.13E-09 | 8.62E-09 |
| KBTBD11-OT1 | 0.598422 | 1.288363 | 1.106304 | 0.000665 | 0.001375 |
| AC008875.1 | 0.072061 | 0.608917 | 3.078946 | 1.74E-11 | 1.88E-10 |
| AL023284.4 | 6.607996 | 18.60696 | 1.493558 | 9.15E-08 | 4.78E-07 |
| AL161669.3 | 1.293504 | 4.434645 | 1.777534 | 7.76E-07 | 3.19E-06 |
| AL354863.1 | 0.74202 | 0.213895 | -1.79455 | 1.29E-21 | 1.39E-19 |
| SLC25A5-AS1 | 1.865844 | 0.804797 | -1.21313 | 6.31E-12 | 7.42E-11 |
| AP001330.4 | 0.896428 | 2.128303 | 1.247443 | 3.74E-12 | 4.58E-11 |
| AC131159.2 | 0.265091 | 0.593962 | 1.163884 | 2.45E-09 | 1.77E-08 |
| AL132712.1 | 0.617055 | 1.672681 | 1.43869 | 0.000834 | 0.001687 |
| AL162724.2 | 0.232293 | 1.121815 | 2.271818 | 1.58E-11 | 1.72E-10 |
| AP001094.2 | 0.103341 | 0.358767 | 1.79563 | 2.12E-07 | 1.03E-06 |
| LINC01355 | 0.41748 | 1.022198 | 1.291894 | 9.80E-05 | 0.000248 |
| AL391883.1 | 1.020326 | 0.378454 | -1.43084 | 1.16E-08 | 7.39E-08 |
| AC027796.4 | 0.573092 | 2.545508 | 2.151114 | 2.03E-08 | 1.23E-07 |
| AC018755.4 | 0.356381 | 1.121431 | 1.653847 | 3.12E-05 | 8.80E-05 |
| LINC00174 | 1.224262 | 3.104546 | 1.34247 | 2.62E-06 | 9.81E-06 |
| LINC01762 | 4.358374 | 0.208131 | -4.38822 | 1.37E-19 | 1.03E-17 |
| TMEM51-AS1 | 0.616507 | 1.309125 | 1.086414 | 0.002067 | 0.00376 |
| AC136475.1 | 0.501255 | 1.327191 | 1.404761 | 8.94E-06 | 2.92E-05 |
| HOXB-AS1 | 1.024602 | 2.378253 | 1.214839 | 3.73E-06 | 1.32E-05 |
| OGFR-AS1 | 0.240971 | 0.53334 | 1.146195 | 4.89E-08 | 2.74E-07 |
| AC016773.2 | 0.308624 | 0.912887 | 1.564584 | 7.07E-06 | 2.36E-05 |
| DNAJC9-AS1 | 0.133421 | 0.292134 | 1.130638 | 0.012985 | 0.019665 |
| AC138150.1 | 0.248683 | 0.517691 | 1.057781 | 0.001505 | 0.002864 |
| EXTL3-AS1 | 0.085885 | 0.224989 | 1.38938 | 0.000313 | 0.0007 |
| HOXB-AS2 | 0.977511 | 0.460701 | -1.08528 | 7.56E-07 | 3.12E-06 |
| TTC21B-AS1 | 0.021902 | 0.379825 | 4.116224 | 0.005211 | 0.008683 |
| PRDM16-DT | 23.63885 | 0.205401 | -6.84658 | 4.42E-20 | 3.82E-18 |
| AC104564.1 | 0.073099 | 0.406127 | 2.474007 | 5.68E-11 | 5.60E-10 |
| AC073655.2 | 0.214217 | 0.500361 | 1.223899 | 6.61E-05 | 0.000175 |
| AC011899.2 | 0.119422 | 0.931838 | 2.964012 | 4.88E-15 | 1.14E-13 |
| LINC01786 | 0.470708 | 1.555101 | 1.724105 | 5.20E-09 | 3.54E-08 |
| MUC12-AS1 | 0.250174 | 7.665058 | 4.937292 | 4.35E-13 | 6.54E-12 |
| AL122125.1 | 0.075366 | 0.345967 | 2.198649 | 2.23E-08 | 1.32E-07 |
| GATA3-AS1 | 2.514899 | 0.325204 | -2.95109 | 3.98E-19 | 2.29E-17 |
| AC105020.5 | 0.405183 | 0.823221 | 1.022706 | 0.000197 | 0.000455 |
| AL121782.1 | 0.117247 | 0.398841 | 1.766266 | 1.02E-06 | 4.10E-06 |
| AC127024.6 | 0.312194 | 0.822208 | 1.397061 | 7.08E-05 | 0.000186 |
| AL121992.3 | 3.035868 | 0.660336 | -2.20084 | 1.05E-10 | 9.62E-10 |
| NR4A1AS | 1.811753 | 0.509409 | -1.83049 | 2.46E-14 | 4.95E-13 |
| AC023510.2 | 0.431357 | 1.064171 | 1.302775 | 1.57E-05 | 4.80E-05 |
| AC116914.2 | 0.368756 | 1.589398 | 2.107741 | 1.04E-10 | 9.57E-10 |
| CACNA1C-AS2 | 0.148334 | 0.335654 | 1.178127 | 0.000274 | 0.000618 |
| ITGB1-DT | 0.068439 | 0.354604 | 2.37332 | 3.34E-08 | 1.94E-07 |
| LINC02585 | 0.430144 | 1.547156 | 1.846728 | 1.20E-13 | 2.12E-12 |
| PCAT19 | 1.215531 | 0.344798 | -1.81776 | 1.10E-16 | 3.39E-15 |
| LINC01679 | 1.062797 | 0.187302 | -2.50443 | 7.58E-16 | 2.01E-14 |
| SERTAD4-AS1 | 3.724718 | 11.12135 | 1.578129 | 2.45E-06 | 9.22E-06 |
| AC005670.1 | 0.14626 | 0.294782 | 1.011108 | 0.010198 | 0.015761 |
| AC009022.1 | 0.472365 | 0.962001 | 1.026138 | 0.000159 | 0.000377 |
| SNHG25 | 0.692977 | 2.262424 | 1.706989 | 1.07E-07 | 5.55E-07 |
| Z99572.1 | 1.375319 | 0.540297 | -1.34794 | 3.53E-12 | 4.36E-11 |
| AC156455.1 | 0.24294 | 1.530957 | 2.655763 | 7.99E-15 | 1.77E-13 |
| AC092123.1 | 0.313505 | 0.674571 | 1.105483 | 2.04E-05 | 6.08E-05 |
| AC084824.6 | 0.805945 | 1.938586 | 1.266252 | 4.18E-06 | 1.46E-05 |
| MIR4435-2HG | 0.955165 | 2.595061 | 1.441947 | 8.38E-15 | 1.83E-13 |
| AC006033.2 | 0.07559 | 0.236209 | 1.643794 | 1.88E-07 | 9.26E-07 |
| SBNO1-AS1 | 0.493147 | 1.200542 | 1.283596 | 1.68E-06 | 6.56E-06 |
| AC020594.1 | 0.274772 | 0.917368 | 1.739266 | 1.43E-06 | 5.65E-06 |
